# Supplementary material
Source: PubMed Central journal article supplement (PMC5931402)
Supplement: NIHMS908779-supplement-1.pdf [file NIHMS908779-supplement-1.pdf]

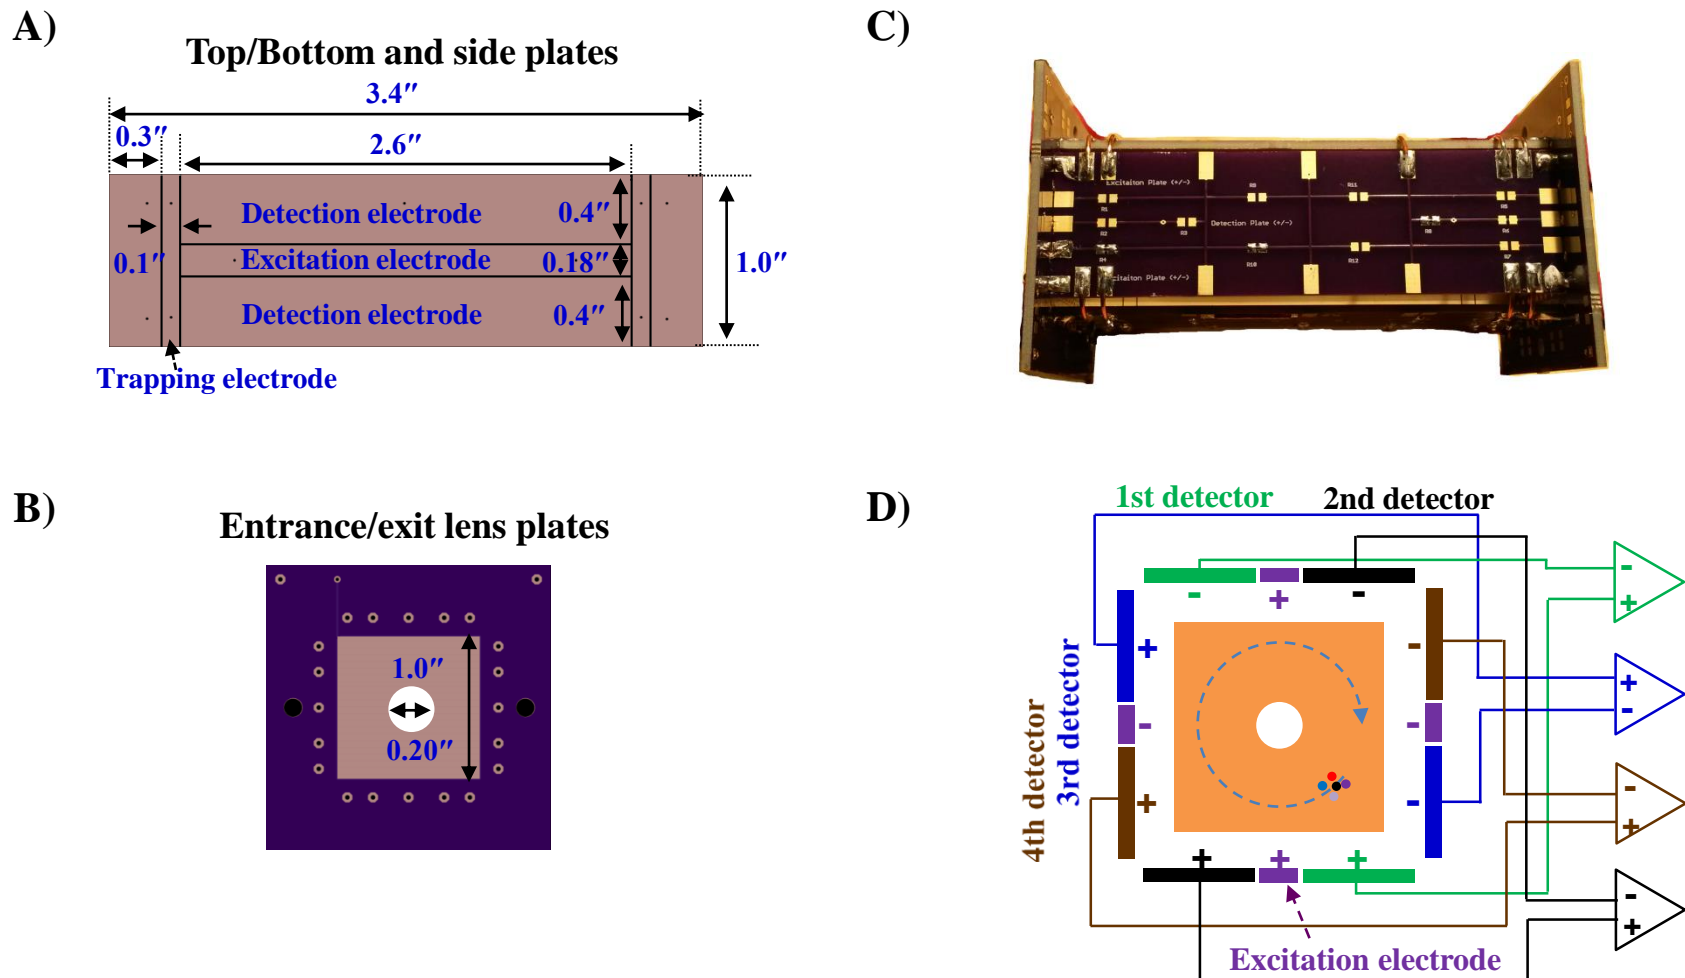

**Figure 1.** Individual PCB components and an ICR cell with 4 pairs of dipole detection electrodes. Top/bottom and side (A) plates showing excitation, detection and trapping electrodes printed on board. Entrance/exit lens plates (B). The assembled ICR cell with 4 pairs of dipole detection electrodes (C) and the transverse cross section (magnetic field axis projects into the plane of this figure) with a wiring diagram (D).

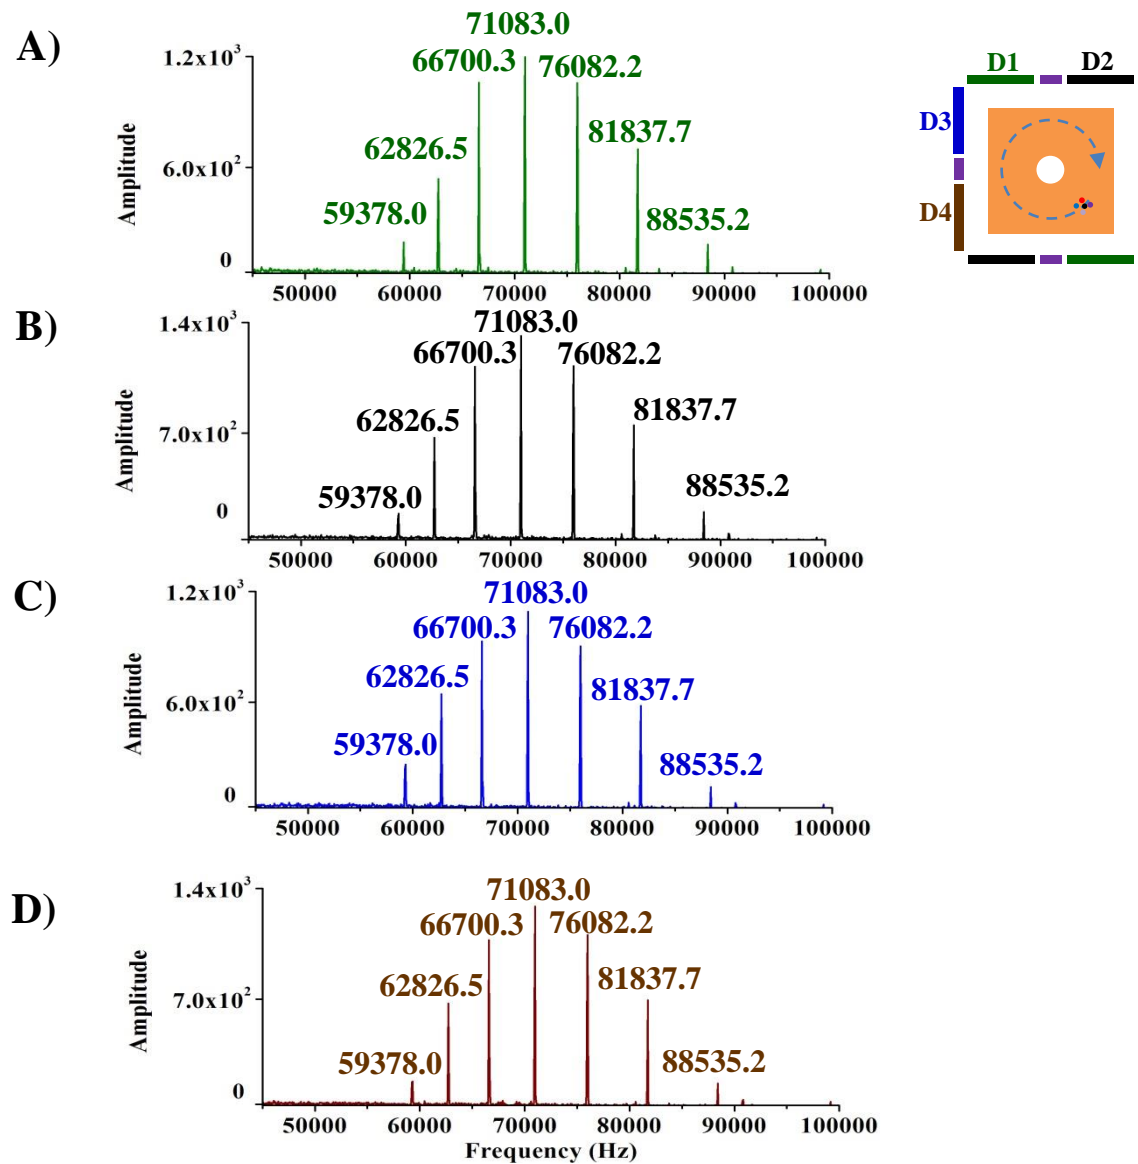

**Figure 2.** Parallel frequency-domain spectra obtained from detector pair 1 (A), detector pair 2 (B), detector pair 3 (C) and detector pair 4 (D) in a single ICR cell at the same time using Ultramark 1621.

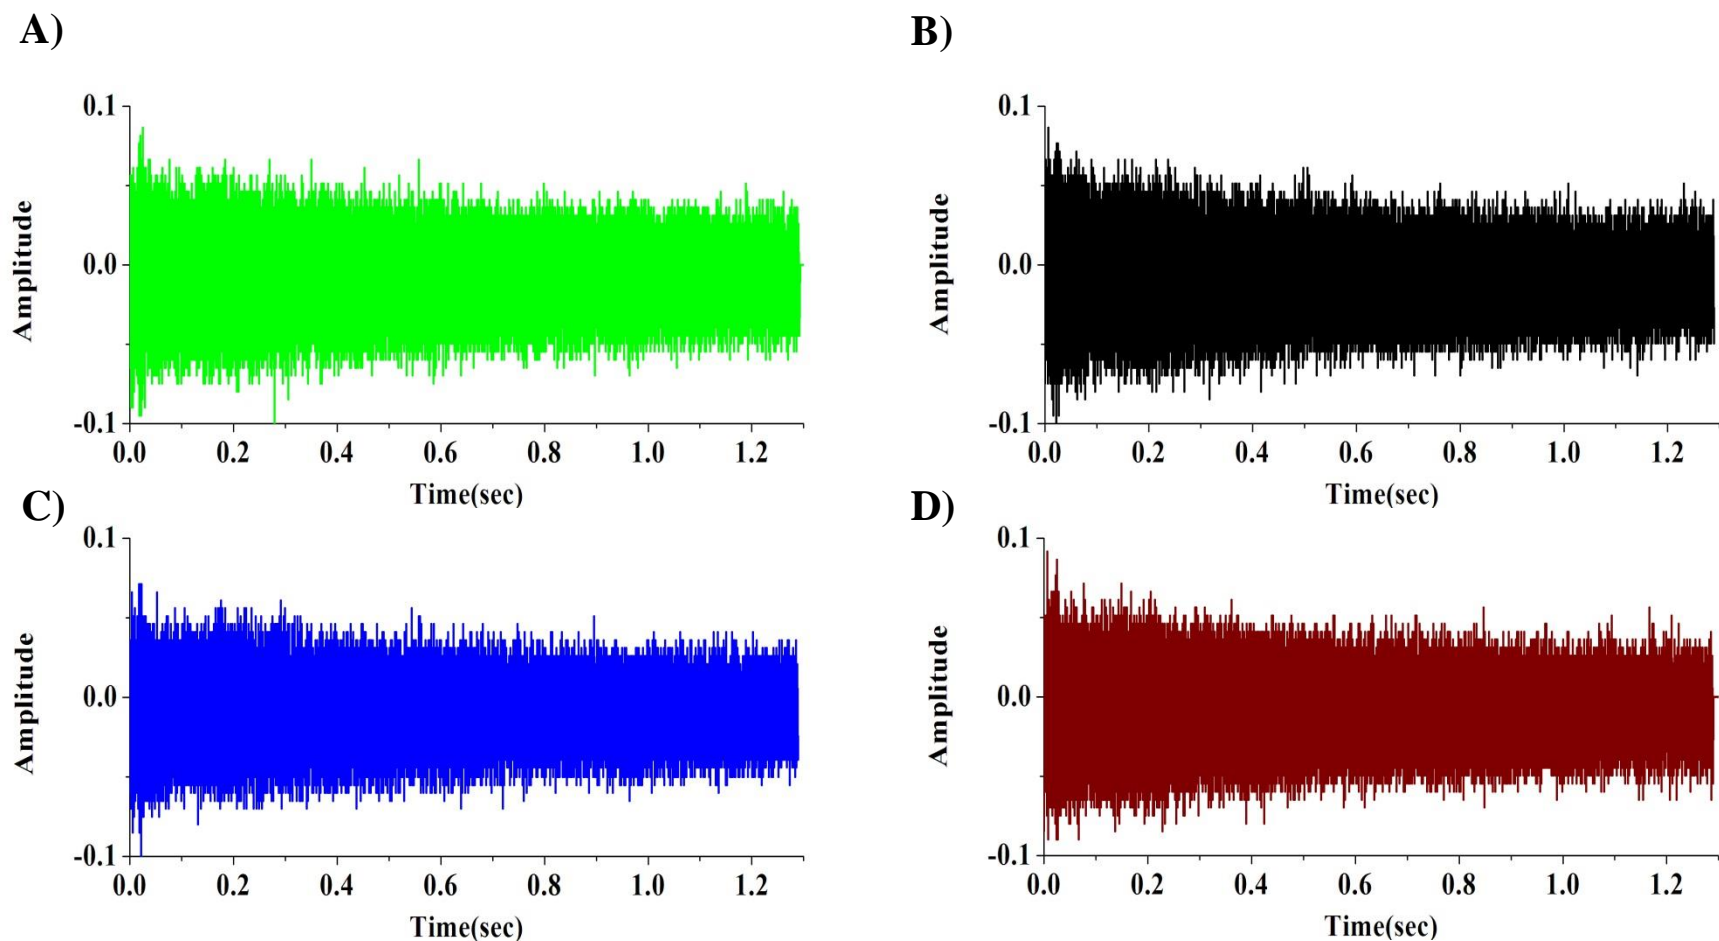

**Figure 3.** Parallel time domain signals (transients) from detector pair 1 (A), detector pair 2 (B), detector pair 3 (C) and detector pair 4 (D) in a single ICR cell at the same time using Ultramark 1621.

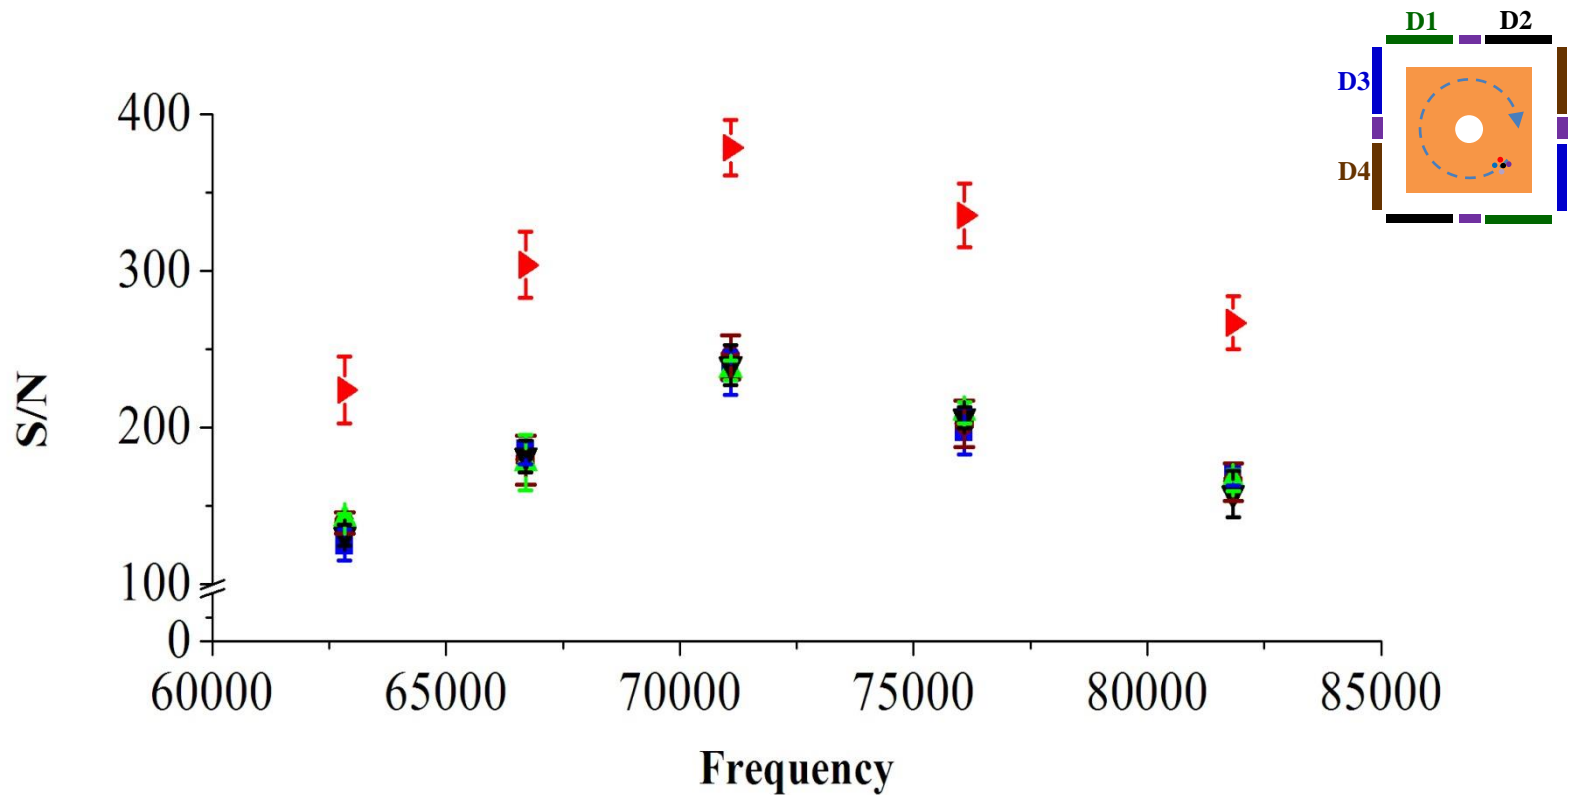

**Figure 4.** S/N for all peaks observed in the parallel frequency-domain spectra from the detector pairs 1(▲), 2(▼), 3(■) and 4 (●), and all peaks observed in the frequency spectrum (▶) from summing the parallel frequency spectra.

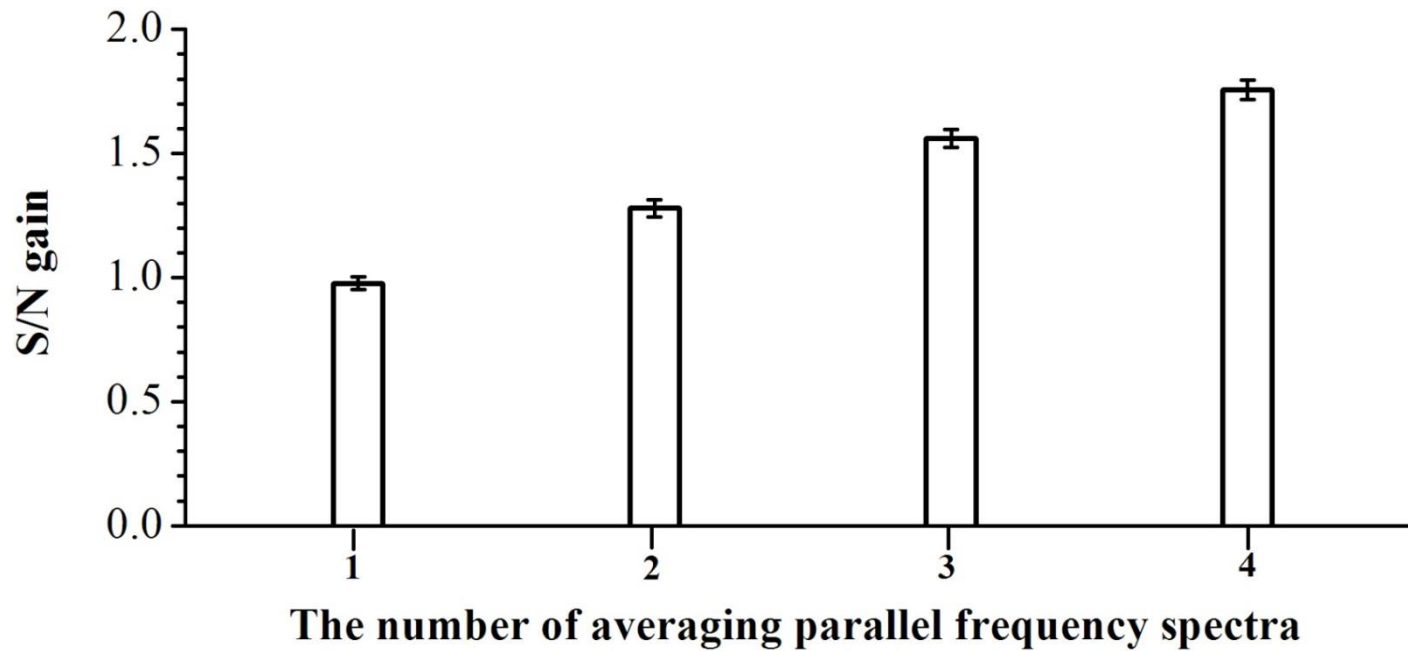

**Figure 5.** Averaged S/N gains as a function of the number of dipole detection electrodes. The averaged S/N gains were obtained from averaging S/N for all peaks

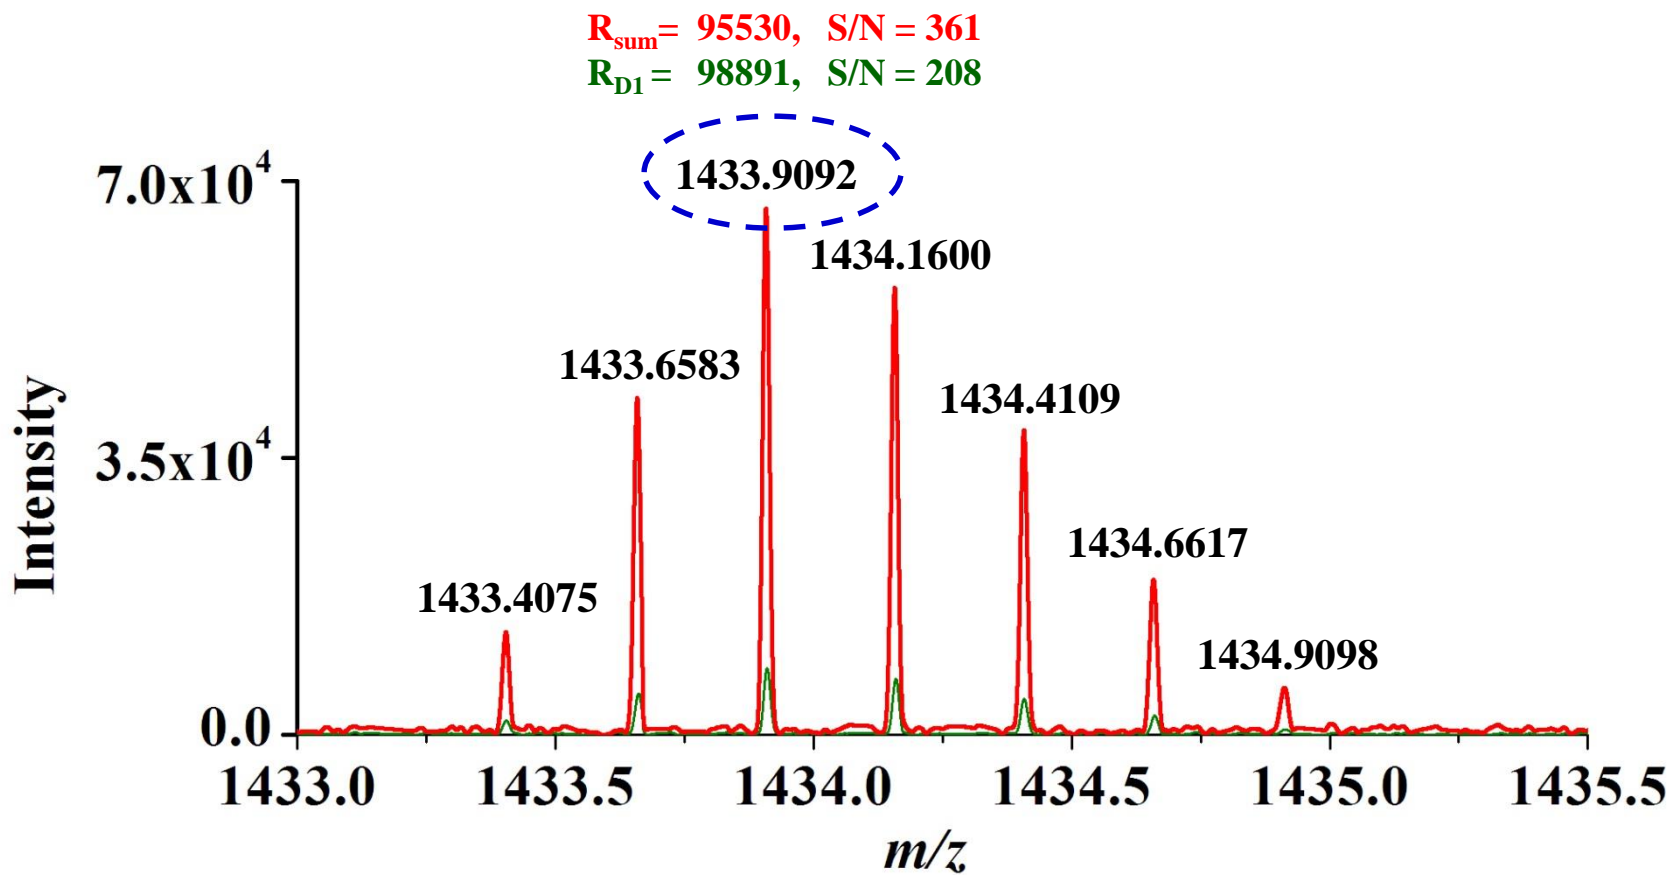

**Figure 6.** Mass spectra of +3 charged insulin ion showing resolving power  $R$  (fwhm) of nearly 100,000 .  $R_{\text{D1}}$  and  $R_{\text{sum}}$  are resolving power for the peaks observed in the mass spectrum from detector pair 1 and the new mass spectrum from summing the 4 parallel spectra.
